# Supplementary material for: Stratospheric aerosol forcing for CMIP7 (part 1): Optical properties for pre-industrial, historical, and scenario simulations (version 2.2.1)
Source: Copernicus journal article supplement (doi:10.5194/egusphere-2025-4990), 2025-10-16
Supplement: Supplementary file 1 [file TableS1_emission_EVA_H_v2_calibration.xlsx]

## Sheet: Sheet1
Volcano name	Eruption year	Eruption month (1-12)	Eruption day (1-31)	Longitude (-180 to 180)	Latitude (-90 to 90)	Sulfur mass (Tg SO2)	Injection height (km a.s.l.)	Minimum stratospheric sulfur mass (Tg SO2)	Maximum stratospheric sulfur mass (Tg SO2)	Best-estimate stratospheric sulfur mass (Tg SO2)
Etna	1979	8	4	15.004	37.734	0.01	10.8903	7.80807e-11	0.0265733	0.00226284
Mt_St_Helens	1980	5	18	-122.18	46.2	0.775	27	0.258602	2.06882	0.775806
Mt_St_Helens	1980	5	25	-122.18	46.2	0.1	14	0.00281411	0.266944	0.100061
Mt_St_Helens	1980	6	13	-122.18	46.2	0.035	16	0.00983638	0.0934304	0.0350362
Lopevi	1980	8	18	168.346	-16.507	0.038	10.7253	2.95635e-16	0.0130775	1.32342e-05
Etna	1980	9	2	15.004	37.734	0.061	9	5.65844e-17	0.153406	5.90121e-05
Ulawun	1980	10	7	151.33	-5.05	0.2	20	0.0321908	0.533888	0.200208
Alaid	1981	4	27	155.55	50.858	1.1	15	0.109422	2.93638	1.10113
Pagan	1981	5	15	145.8	18.13	0.32	20	0.0428909	0.854221	0.320331
Bezymianny	1981	6	13	160.587	55.978	0.01	8	2.84043e-20	0.0218911	7.28815e-07
El_Chichon	1982	3	29	-93.228	17.36	1.09	17	0.0200358	2.90969	0.837329
El_Chichon	1982	4	4	-93.228	17.36	7	28	2.33576	18.6861	7.00728
Galunggung	1982	4	8	108.058	-7.25	0.095	12.7444	4.46497e-08	0.169781	1.67087e-05
Galunggung	1982	4	24	108.058	-7.25	0.125	18	0.000114898	0.33368	0.121683
Galunggung	1982	5	5	108.058	-7.25	0.1	16	4.54302e-06	0.266943	0.0375367
Galunggung	1982	5	17	108.058	-7.25	0.19	16	8.63174e-06	0.507191	0.0713197
Galunggung	1982	6	3	108.058	-7.25	0.22	14.4605	4.10789e-07	0.5858	0.00623099
Galunggung	1982	6	24	108.058	-7.25	0.43	14	2.10452e-07	1.13427	0.00313139
Galunggung	1982	7	13	108.058	-7.25	0.44	16	5.72946e-06	1.17455	0.256996
Galunggung	1982	8	15	108.058	-7.25	0.01	14	3.59495e-10	0.0265761	0.000181835
Soputan	1982	8	27	124.725	1.108	0.09	15	5.28665e-09	0.240232	0.0161508
Colo	1983	7	24	121.608	-0.17	0.2	15	4.0059e-09	0.533786	0.0245842
Pavlof	1983	11	15	-161.9	55.42	0.05	7.5	5.52674e-23	0.0693194	7.70434e-08
Soputan	1984	5	24	124.725	1.108	0.166	16	4.69133e-08	0.443125	0.0639647
Mayon	1984	9	13	123.685	13.257	0.05	12.1873	2.49649e-08	0.0908603	0.000385631
Bezymianny	1984	10	13	160.587	55.978	0.01	9	1.42517e-16	0.026037	3.0044e-05
Bezymianny	1985	7	1	160.587	55.978	0.01	10.4223	4.07141e-12	0.0266873	0.00105512
Ruiz	1985	11	14	-75.323	4.895	0.66	25	0.220229	1.76183	0.660686
Augustine	1986	3	27	-153.42	59.37	0.02	15	0.000706306	0.0533888	0.0200155
Pavlof	1986	4	19	-161.9	55.42	0.07	16	0.0146943	0.186861	0.0700728
Oshima	1986	11	19	139.38	34.73	0.022	9.29937	9.2691e-16	0.0562908	0.000100075
Chikurachki	1986	11	20	155.458	50.325	0.5	11	9.14573e-09	1.33469	0.137947
Chikurachki	1986	12	2	155.458	50.325	0.25	11	1.38864e-09	0.667328	0.0523594
Kliuchevskoi	1987	2	19	160.638	56.057	0.01	9	2.45424e-20	0.0217717	6.80628e-07
Banda_Api	1988	5	9	129.871	-4.525	0.25	16	1.07505e-06	0.667348	0.0701763
Makian	1988	7	29	127.4	0.32	0.05	16	2.45116e-08	0.133472	0.025072
Redoubt	1989	12	15	-152.75	60.48	0.14	12	1.22162e-07	0.373721	0.0789089
Kliuchevskoi	1990	1	30	160.638	56.057	0.01	10	1.39765e-15	0.0263873	7.33515e-05
Kelut	1990	2	11	112.308	-7.93	0.15	20	0.0129949	0.400416	0.150152
Redoubt	1990	3	9	-152.75	60.48	0.016	11.2299	5.5202e-11	0.0427082	0.00298149
Pinatubo	1991	6	13	120.35	15.13	0.14	19	0.00366574	0.373722	0.140026
Pinatubo	1991	6	15	120.35	15.13	15.054	25	15.054	15.054	15.0697
Hudson	1991	8	9	-72.97	-45.9	0.7	12	9.51165e-10	1	0.102682
Hudson	1991	8	15	-72.97	-45.9	3.3	18	0.995599	4	3.30343
Spurr	1992	6	27	-152.25	61.3	0.25	18	0.0833755	0.66736	0.25026
Spurr	1992	8	18	-152.25	61.3	0.3	13.5	0.00142034	0.800832	0.29856
Spurr	1992	9	17	-152.25	61.3	0.25	15	0.0312015	0.66736	0.250259
Lascar	1993	4	19	-67.73	-23.37	0.45	16	0.0513579	1.20124	0.268822
Rabaul	1994	9	19	152.203	-4.271	0.2	20	0.0355774	0.533888	0.200208
Kliuchevskoi	1994	10	1	160.638	56.057	0.15	15	0.014918	0.400416	0.150154
Ruapehu	1996	6	17	175.57	-39.28	0.08	10	1.86388e-15	0.208643	0.000292149
Ruapehu	1996	7	20	175.57	-39.28	0.01	11	4.28966e-15	0.0264456	0.000111446
Grimsvotn	1996	10	2	-17.33	64.42	0.01	10	1.41666e-13	0.0266501	0.000377751
Popocatepetl	1997	7	3	-98.622	19.023	0.007	13	8.30612e-07	0.0162323	0.000777891
Manam	1998	10	5	145.061	-4.1	0.017	16	3.38522e-08	0.0453804	0.00755923
Popocatepetl	1998	11	25	-98.622	19.023	0.01	13.0053	2.57744e-07	0.0220265	0.00106343
Shishaldin	1999	4	19	-163.97	54.75	0.063	13.7	0.000345694	0.168175	0.0627545
Soufriere_Hills	1999	7	20	-62.18	16.72	0.016	11.1	8.59946e-12	0.0100633	0.000187221
Hekla	2000	2	26	-19.7	63.98	0.183	11	1.45505e-11	0.488174	0.0119426
Miyakejima	2000	8	18	139.53	34.08	0.043	16	0.0093908	0.114786	0.0423876
Ulawun	2000	9	28	151.33	-5.05	0.037	16	1.01772e-07	0.0987692	0.0188204
Popocatepetl	2000	12	17	-98.622	19.023	0.049	14.235	6.50507e-05	0.126274	0.00563107
Popocatepetl	2001	1	23	-98.622	19.023	0.017	12	5.59294e-10	0.0144725	0.000914344
Cleveland	2001	2	19	-169.95	52.82	0.006	10	4.86558e-17	0.0155487	1.43518e-05
Ulawun	2001	4	30	151.33	-5.05	0.03	14	4.4003e-08	0.0768712	4.63384e-05
Tungurahua	2001	8	6	-78.442	-1.467	0.032	13	3.70527e-13	0.0751046	6.35578e-06
Ruang	2002	9	26	125.37	2.3	0.08	22	0.0262635	0.213555	0.0800832
Etna	2002	10	27	15.004	37.734	0.08	13.8255	0.00128954	0.213509	0.07959
Reventador	2002	11	3	-77.656	-0.078	0.084	17	5.72473e-07	0.224233	0.061208
Tungurahua	2003	3	8	-78.442	-1.467	0.012	12.7838	9.26957e-11	0.0182937	4.69712e-08
Anatahan	2003	5	11	145.67	16.35	0.114	15	0.000530435	0.303852	0.00884893
Lopevi	2003	6	9	168.346	-16.507	0.05	12	2.30334e-10	0.0555932	0.00085355
Soufriere_Hills	2003	7	13	-62.18	16.72	0.1	16	0.0010943	0.266944	0.0507119
Manam	2004	10	27	145.061	-4.1	0.026	18	3.99824e-05	0.0694054	0.0255726
Grimsvotn	2004	11	2	-17.33	64.42	0.03	12	1.95047e-07	0.0800832	0.0218004
Manam	2004	11	24	145.061	-4.1	0.111	18	9.75642e-05	0.296308	0.108085
Manam	2004	12	20	145.061	-4.1	0.038	17	3.64328e-07	0.101439	0.027166
Manam	2005	1	28	145.061	-4.1	0.14	24	0.0467138	0.373722	0.140146
Anatahan	2005	4	5	145.67	16.35	0.075	16	0.00062906	0.200196	0.01686
Anatahan	2005	6	11	145.67	16.35	0.064	14	6.62395e-05	0.166422	0.00274232
Anatahan	2005	7	19	145.67	16.35	0.078	12	2.69201e-08	0.0981269	0.0023485
Anatahan	2005	7	21	145.67	16.35	0.005	16	5.01817e-05	0.0133472	0.00235882
Santa_Ana	2005	10	1	-89.63	13.853	0.012	14	1.82157e-06	0.0315433	0.000208541
Augustine	2006	1	29	-153.42	59.37	0.01	10	1.77603e-16	0.0260805	3.2814e-05
Manam	2006	2	27	145.061	-4.1	0.05	19	0.000253891	0.133472	0.0497819
Bezymianny	2006	5	9	160.587	55.978	0.005	15	0.000646676	0.0133472	0.00500518
Soufriere_Hills	2006	5	20	-62.18	16.72	0.2	20	0.0223242	0.533888	0.200205
Tungurahua	2006	7	15	-78.442	-1.467	0.01	12	4.6073e-15	0.0127544	1.13823e-08
Tungurahua	2006	8	16	-78.442	-1.467	0.03	16	1.72417e-08	0.0800831	0.0155999
Rabaul	2006	10	7	152.203	-4.271	0.3	18	0.000493606	0.800832	0.295361
Bezymianny	2007	10	15	160.587	55.978	0.005	10	1.69331e-13	0.0133329	0.000250174
Soputan	2007	10	25	124.725	1.108	0.012	14	1.4041e-10	0.0315276	6.21104e-05
Llaima	2008	1	1	-71.729	-38.692	0.03	13	0.000126828	0.0800238	0.0297487
Chaiten	2008	5	5	-72.646	-42.833	0.01	13	5.87215e-06	0.0266934	0.00964588
Chaiten	2008	5	6	-72.646	-42.833	0.004	17	0.00128612	0.0106778	0.00400401
Soputan	2008	6	6	124.725	1.108	0.033	14	6.03793e-10	0.0867766	0.000182064
Okmok	2008	7	12	-168.13	53.42	0.15	15	0.0137122	0.400416	0.150153
Kasatochi	2008	8	7	-175.508	52.177	2	15	0.148259	5.33888	2.002
Redoubt	2009	3	24	-152.75	60.48	0.139	18	0.0459779	0.371052	0.139145
Redoubt	2009	4	4	-152.75	60.48	0.02	12	8.97159e-08	0.0533888	0.0139538
Sarychev_Peak	2009	6	15	153.2	48.092	1.2	17	0.393515	3.20333	1.20125
Soufriere_Hills	2010	2	12	-62.18	16.72	0.03	18	0.000463742	0.0800832	0.0268689
Eyjafjallajokull	2010	4	14	-19.62	63.63	0.005	9	6.50418e-18	0.0126967	5.5988e-06
Eyjafjallajokull	2010	5	5	-19.62	63.63	0.081	8	4.35866e-20	0.165569	2.68781e-06
Eyjafjallajokull	2010	5	15	-19.62	63.63	0.135	8	7.26443e-20	0.275948	4.47968e-06
Pacaya	2010	5	28	-90.601	14.381	0.023	18	0.000129973	0.0613971	0.0218453
Sheveluch	2010	10	27	161.36	56.653	0.011	12	3.37607e-08	0.0293638	0.00734014
Merapi	2010	11	4	110.442	-7.542	0.3	17	0.05	2	0.24719
Kizimen	2010	12	13	160.32	55.131	0.037	10	4.2481e-15	0.0975503	0.000251818
Kizimen	2011	1	1	160.32	55.131	0.023	8	5.54531e-24	0.0279927	1.61379e-08
Grimsvotn	2011	5	21	-17.33	64.42	0.3	12	1.95879e-06	0.800832	0.218102
Cordon_Caulle	2011	6	4	-72.117	-40.59	0.2	14	0.000212448	0.5	0.195341
Nabro	2011	6	13	41.7	13.37	1.975	18	0.00827951	5.27214	1.93126
Soputan	2011	7	3	124.725	1.108	0.01	14	6.16027e-11	0.0263973	7.59672e-05
Pavlof	2013	6	25	-161.9	55.42	0.005	9.27656	1.49633e-15	0.0132312	4.88309e-05
Kelut	2014	2	13	112.308	-7.93	0.2	19	0.02	0.533888	0.199864
Sangeang_Api	2014	5	30	119.058	-8.18	0.1	17	1.16081e-05	0.266944	0.0737045
Zhupanovsky	2014	6	20	159.15	53.589	0.006	9	9.09283e-17	0.0156296	1.84765e-05
Rabaul	2014	8	29	152.203	-4.271	0.031	18	9.62865e-05	0.0827526	0.030749
Sheveluch	2014	9	24	161.36	56.653	0.005	12	3.24093e-08	0.0133472	0.00363223
Sheveluch	2015	2	28	161.36	56.653	0.015	9	2.721e-20	0.0322794	8.85855e-07
Calbuco	2015	4	22	-72.614	-41.326	0.4	20	0.133424	1.06778	0.400416
Zhupanovsky	2015	7	12	159.15	53.589	0.01	10	7.70764e-13	0.0266758	0.000646426
Manam	2015	7	31	145.061	-4.1	0.05	19	0.00147592	0.133472	0.0500328
Cotopaxi	2015	8	14	-78.436	-0.677	0.02	18	5.25596e-05	0.0533888	0.0198058
Chirinkotan	2016	11	28	153.48	48.98	0.01	9	3.55784e-17	0.0257047	1.7057e-05
Bogoslof	2016	12	22	-168.03	53.93	0.009	10.7	4.65395e-12	0.0240194	0.00101552
Bogoslof	2017	1	26	-168.03	53.93	0.0052	10	1.27207e-14	0.0138295	0.000108362
Bogoslof	2017	3	8	-168.03	53.93	0.022	11	9.20681e-11	0.0587243	0.00430036
Kambalny	2017	3	27	156.875	51.306	0.055	7	7.42088e-27	0.0286691	6.9051e-10
Bogoslof	2017	5	28	-168.03	53.93	0.02	11	8.36982e-11	0.0533857	0.00390942
Bezymianny	2017	6	16	160.587	55.978	0.008	12	1.4841e-08	0.0213555	0.00500892
Bogoslof	2017	8	7	-168.03	53.93	0.008	13	1.73702e-06	0.0213555	0.00747162
Bezymianny	2017	12	20	160.587	55.978	0.01	18	0.0033244	0.0266944	0.0100104
Sinabung	2018	2	19	98.392	3.17	0.015	17	5.83971e-08	0.0400416	0.00964844
Ambae	2018	4	5	167.83	-15.4	0.15	17	0.00130437	0.400416	0.0978914
Fuego	2018	6	3	-90.88	14.473	0.02	15	2.17877e-05	0.0532187	0.000791455
Ambae	2018	7	26	167.83	-15.4	0.39	17	0.00339137	1.04108	0.254518
Manam	2018	8	25	145.061	-4.1	0.02	17	1.25829e-07	0.0533888	0.0128646
Manam	2018	10	1	145.061	-4.1	0.004	17	2.51658e-08	0.0106778	0.00257293
Manam	2018	12	8	145.061	-4.1	0.01	17	6.29145e-08	0.0266944	0.00643232
Krakatau	2018	12	25	105.423	-6.102	0.125	17	3.07377e-06	0.33368	0.0804064
Manam	2019	1	15	145.061	-4.1	0.025	16	9.14052e-08	0.0667328	0.00520691
Bezymianny	2019	3	16	160.587	55.978	0.01	15	0.00065157	0.0266944	0.0100098
Sinabung	2019	5	25	98.392	3.17	0.005	15	1.68714e-09	0.0133039	0.000116152
Raikoke	2019	6	22	153.25	48.292	1.4	13	0.3	3.73721	1.30753
Ulawun	2019	6	26	151.33	-5.05	0.15	19	0.00116262	0.400416	0.149669
Manam	2019	6	27	145.061	-4.1	0.01	15	2.23107e-08	0.0266079	0.000232371
Ubinas	2019	7	19	-70.903	-16.355	0.1	13	1.76501e-05	0.175378	0.00401486
Ulawun	2019	8	3	151.33	-5.05	0.19	19	0.00147266	0.507194	0.189581
Sheveluch	2019	8	29	161.36	56.653	0.025	11	1.04623e-10	0.0667321	0.00488677
Sheveluch	2019	10	21	161.36	56.653	0.008	11	3.34793e-11	0.0213543	0.00156377
wildfire aus	2019	12	1	180	-33	0.7	20	0.1	5	0.700726
Taal	2020	1	12	120.993	14.002	0.17	17	0.000696014	0.453805	0.110148
Krakatau	2020	4	10	105.423	-6.102	0.05	15	6.2104e-07	0.133039	0.00116455
Lewotolo	2020	11	29	123.508	-8.274	0.03	17	3.68446e-06	0.0800832	0.0193007
Etna	2021	2	21	15.004	37.734	0.073	12	1.34741e-07	0.19409	0.0454758
Etna	2021	3	7	15.004	37.734	0.047	8	6.53337e-22	0.0780771	2.60252e-07
Sangay	2021	3	11	-78.341	-2.005	0.04	17	1.14156e-07	0.106778	0.0257291
Etna	2021	3	19	15.004	37.734	0.051	11	2.12354e-10	0.135463	0.00991872
Soufriere_St_Vincent	2021	4	9	-61.18	13.33	0.5	18	0.00165419	1.33472	0.470112
Sangay	2021	4	13	-78.341	-2.005	0.02	12	3.79e-12	0.0111076	3.13477e-08
Sangay	2021	5	7	-78.341	-2.005	0.013	17	3.71006e-08	0.0347027	0.00836196
Fukutoku_Okanoba	2021	8	12	141.481	24.285	0.02	17	0.00275563	0.0533888	0.0160317
Manam	2021	10	19	145.061	-4.1	0.01	17	6.29145e-08	0.0266944	0.00643232
Karymsky	2021	11	3	159.43	54.05	0.01	12	1.85512e-08	0.0266944	0.00626115
Hunga_Tonga_Hungaapai	2021	12	19	-175.38	-20.57	0.01	16	0.000560057	0.0266934	0.00355243
Hunga_Tonga_Hungaapai	2022	1	13	-175.38	-20.57	0.06	20	0.00710486	0.160166	0.0600601
Hunga_Tonga_Hungaapai	2022	1	15	-175.38	-20.57	0.4	30	0.133472	4	0.400416
Manam	2022	3	8	145.061	-4.1	0.005	15	1.11554e-08	0.0133039	0.000116185
Bezymianny	2022	3	16	160.587	55.978	0.005	12	9.27561e-09	0.0133472	0.00313058
Manam	2022	4	18	145.061	-4.1	0.01	15	2.23107e-08	0.0266079	0.000232371
Karymsky	2022	4	20	159.43	54.05	0.008	10	1.95703e-14	0.0212762	0.00016671
Bezymianny	2022	5	28	160.587	55.978	0.01	15	0.00065157	0.0266944	0.0100098
Sheveluch	2023	4	10	161.36	56.653	0.215	10	5.25952e-13	0.571797	0.00448034
Shishaldin	2023	7	18	-163.97	54.75	0.02	10	4.89257e-14	0.0531904	0.000416776
Shishaldin	2023	8	4	-163.97	54.75	0.008	8	1.1177e-22	0.0133571	4.45229e-08
Shishaldin	2023	8	18	-163.97	54.75	0.033	10	8.07275e-14	0.0877642	0.00068768
Shishaldin	2023	9	5	-163.97	54.75	0.023	10	5.62646e-14	0.061169	0.000479292
Shishaldin	2023	9	25	-163.97	54.75	0.09	11	3.76642e-10	0.240236	0.0175924
Kliuchevskoi	2023	11	1	160.638	56.057	0.2	10	4.89257e-13	0.531904	0.00416776
Ulawun	2023	11	20	151.33	-5.05	0.104	15	5.34327e-07	0.276722	0.00241826
